# Supplementary material for: Morphology and doping engineering of sulfur-doped g-C3N4 hollow nanovesicles for boosting photocatalytic hydrogen production
Source: Royal Society of Chemistry journal article supplement (doi:10.1039/d4ta09249j), 2025-01-01
Supplement: d4ta09249j1.pdf [file d4ta09249j1.pdf]

## Supporting Information

### **Morphology and doping engineering of sulfur-doped g-C<sub>3</sub>N<sub>4</sub> hollow nanovesicles for boosting photocatalytic hydrogen production**

Zifan Zhang <sup>a, ‡</sup>, Changhui Song <sup>a, ‡</sup>, Jipeng Fan <sup>a</sup>, Zhijie Fang <sup>c</sup>, Haitao Wang <sup>a, b, \*</sup>, Jing Zou <sup>a, \*</sup>

<sup>a</sup> *School of Chemistry and Environmental Engineering, Novel Catalytic Materials of Hubei Engineering Research Center, Wuhan Institute of Technology, Wuhan 430205, China.*

<sup>b</sup> *Hubei Three Gorges Laboratory, Mazongling Road, Xiaoting District, Yichang 443000, Hubei, China.*

<sup>c</sup> *School of Electronics Engineering, Guangxi University of Science and Technology, Liuzhou 545006, China.*

‡ *These authors contributed equally to this work.*

**\* Corresponding Author**

\* E-mail: wanghaitao@wit.edu.cn (H. Wang); jingzou@wit.edu.cn (J. Zou)

## Characterizations

A field emission scanning electron microscopy (FESEM, Gemini SEM 300, Germany Zeiss) with an energy-dispersive X-ray spectroscope (EDX) was employed to examine the surface morphology and element composition of as-obtained catalysts. The microstructure of all samples were examined by transmission electron microscopy (TEM) using a Tecnai G220 microscope operating at an acceleration voltage of 200 kV. A powder X-ray diffractometer (XRD, Bruker D8 ADVANCE diffractometer) was used to record the crystallographic structures of all samples. A X-ray photoelectron spectroscopy (XPS, ESCALAB XI<sup>+</sup> -600W, Thermo Fisher Scientific) was adopted to analyze the electronic structures and surface chemical components of as-obtained photocatalysts. The Brunner–Emmet–Teller (BET) measurements were recorded by N<sub>2</sub> adsorption-desorption isotherm on a surface analyzer (ASAP 2020 HD88, Micromeritics USA). The pore size distributions (PSD) were calculated according to the Barrett–Joyner–Halenda (BJH) method from the branch of adsorption isotherm.

## Photoelectrochemical measurements

UV-Vis DRS were performed at a Carry5000 UV-Vis spectrophotometer (Agilent, USA). PL spectra were measured at an Edinburgh FLS980 (England) spectrophotometer. Transient photocurrent (TPC) responses and electrochemical impedance spectroscopy (EIS) measurements were evaluated on an electrochemical workstation (CHI660e Instruments) with a standard three-electrode photoelectrochemical cell, where an Ag/AgCl electrode, a platinum-wire electrode and a photocatalyst-coated glassy carbon electrode (GCE, 3 mm in diameter) were employed as the reference, counter, and working electrodes, respectively. Moreover, the potentials in this work were all converted to reversible hydrogen electrode (RHE,  $E_{\text{RHE}} = E_{\text{Ag/AgCl}} + 0.1987 + 0.05916\text{pH}$ ). The electrolytes required for PC responses and EIS measurements were  $0.5 \text{ mol}\cdot\text{L}^{-1} \text{ Na}_2\text{SO}_4$  and  $5 \text{ mmol}\cdot\text{L}^{-1}$  potassium ferricyanide solution, respectively. In addition, a 10 W xenon lamp was employed as the light source for PC responses test.

## Photocatalytic hydrogen evolution tests

Photocatalytic HER activity was obtained in an automatic on-line four trace gas analysis system (Labsolar-6A, Beijing PerfectLight) with a 300 W Xe lampas light source (cutoff filter  $\lambda \geq 420$  nm). Before light exposure, 20 mg of catalysts, 3 wt% of platinum (provided by  $\text{H}_2\text{PtCl}_6 \cdot 6\text{H}_2\text{O}$ ), and 10 mL of triethanolamine were ultrasonic mixed with 90 mL of deionized water at least 30 min. Especially, air must be removed from the photoreactor before testing. In addition, a circulating cooling water (below 10 °C) system was employed to eliminate thermal effect.  $\text{H}_2$  was determined by an online gas chromatograph (GC9790II, China) accompanied with a thermal conductivity detector.

The corresponding AQE values were obtained according to the followed equations.

$$AQE(\%) = \frac{\text{number of reacted electrons}}{\text{number of incident photons}} \times 100\%$$

$$= \frac{2 \times \text{number of evolved } \text{H}_2 \text{ molecules}}{\text{number of incident photons}} \times 100\%$$

## Details of theoretical calculations

DFT calculations were realized by using the CASTEP module of VASP. The exchange-correlation function in the form of Perdew-Burke-Ernzerhof was employed to study the surfaces of CN and HV-SCN. The Brillouin zone was sampled by Monkhorst Pack method ( $3 \times 3 \times 1$   $k$ -point grid). Moreover, the semiempirical dispersion correction of the Grimme scheme was considered for geometric optimization of CN and HV-SCN. Therein, the total energy of convergence criterion and the maximum force are  $1.0 \times 10^{-5}$  eV·atom<sup>-1</sup> and 0.03 eV·Å<sup>-1</sup>, respectively. The maximum displacement and stress and are  $1.0 \times 10^{-3}$  Å and 0.05 GPa, respectively.

The free energy calculation of hydrogen adsorption ( $\Delta G_{H^*}$ ) was defined by Nørskov et al.'s hydrogen electrode model as follows:

$$\Delta G_{H^*} = \Delta E_{H^*} + \Delta E_{ZPE} - T\Delta S$$

Where  $\Delta E$ ,  $\Delta E_{ZPE}$ , and  $\Delta S$  respectively represent the changes of electronic energy, zero-point energy, and entropy that caused by adsorption of hydrogen. The ideal  $\Delta G_{H^*}$  is near zero, which could balance the adsorption and desorption of hydrogen reaction.

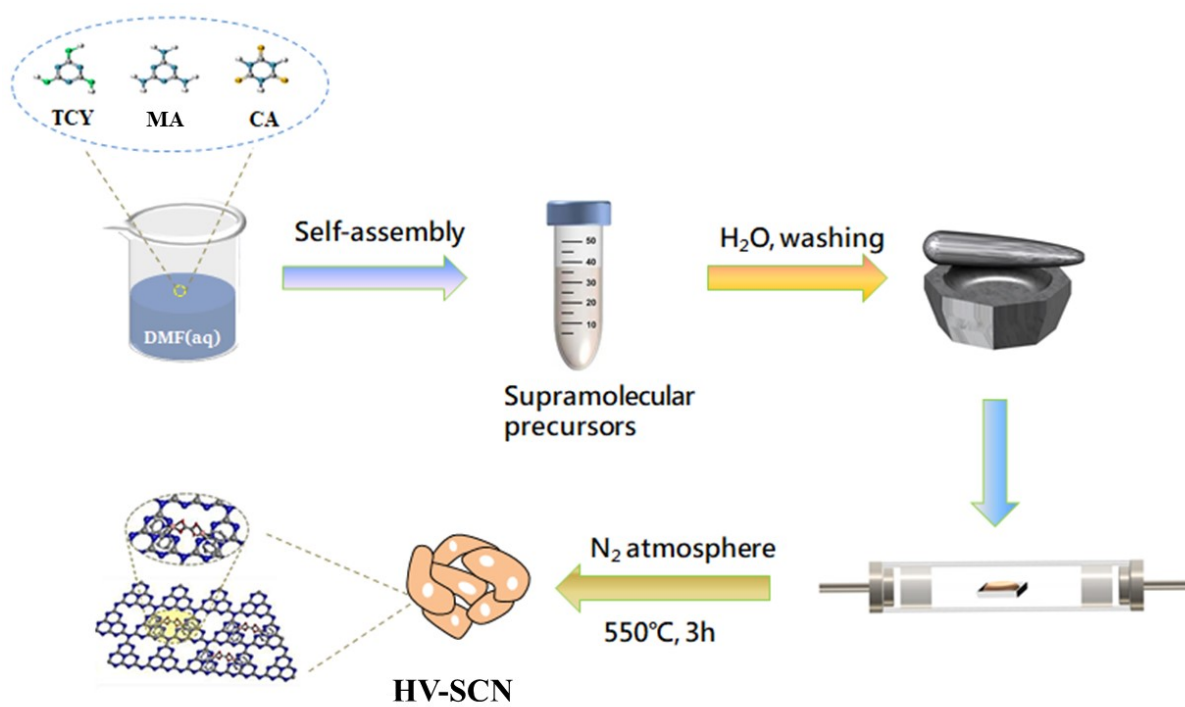

**Figure S1.** Schematic illustration of the preparation process of HV-SCN.

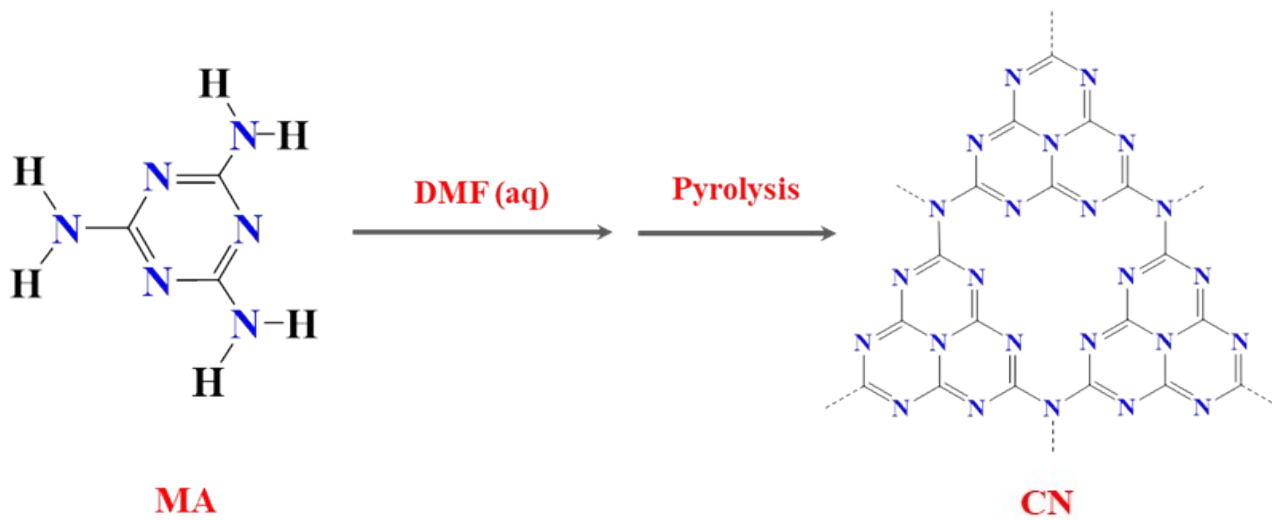

**Figure S2.** Schematic illustration of CN sample.

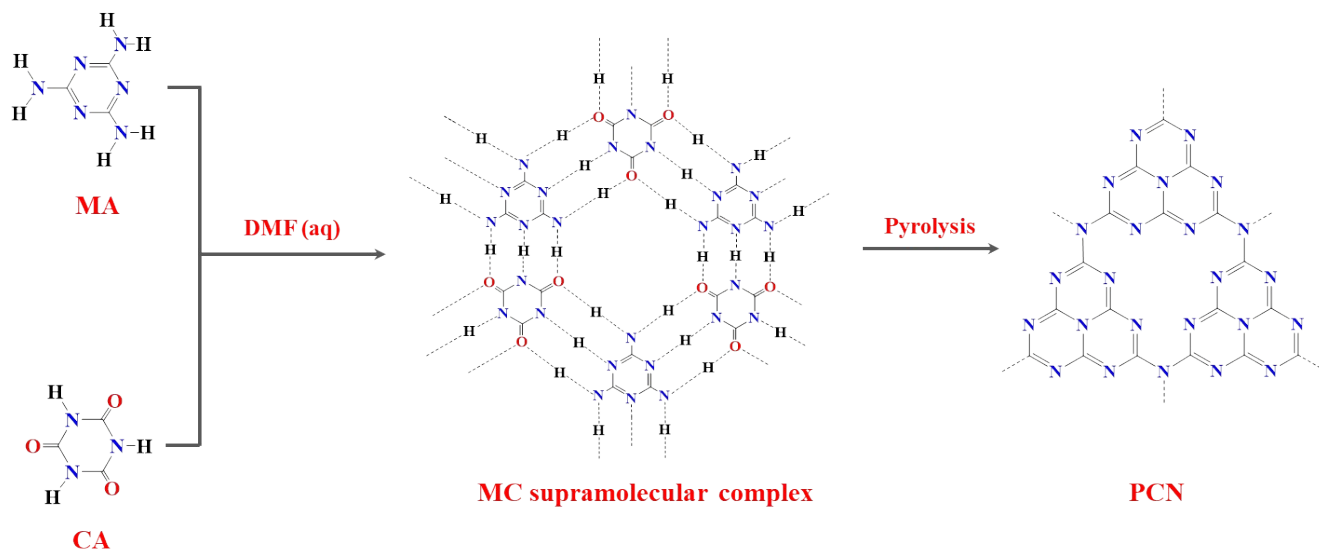

**Figure S3.** The pre-assembly formation of PCN sample.



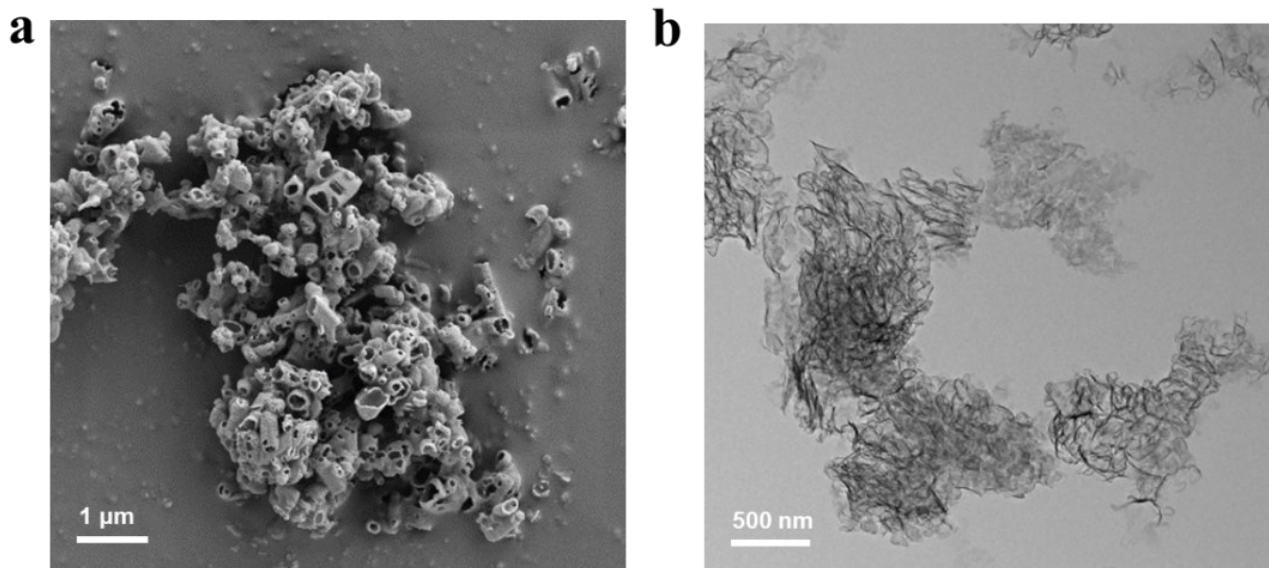

**Figure S4.** (a) SEM and (b) TEM images of HV-SCN.

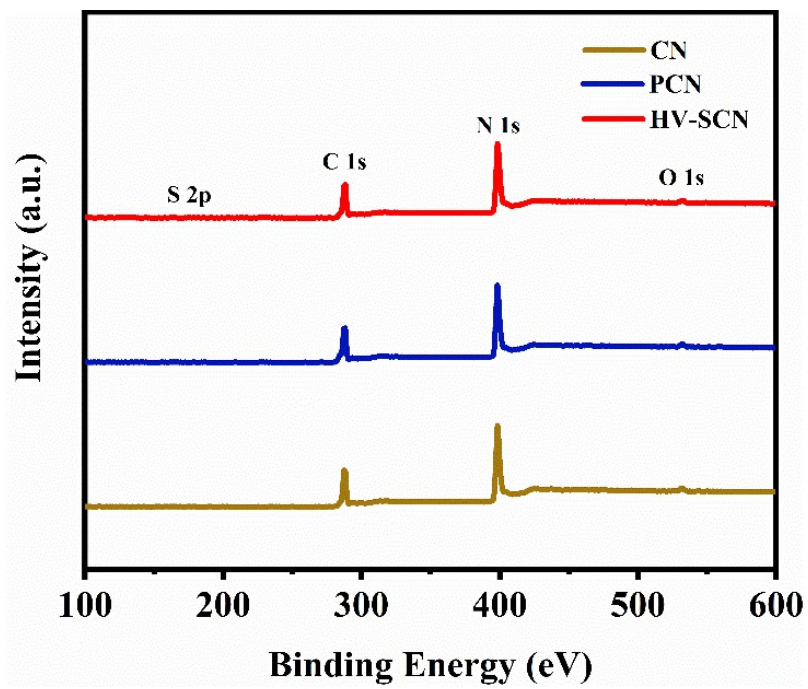

**Figure S5.** XPS survey spectra of CN, PCN and HV-SCN.

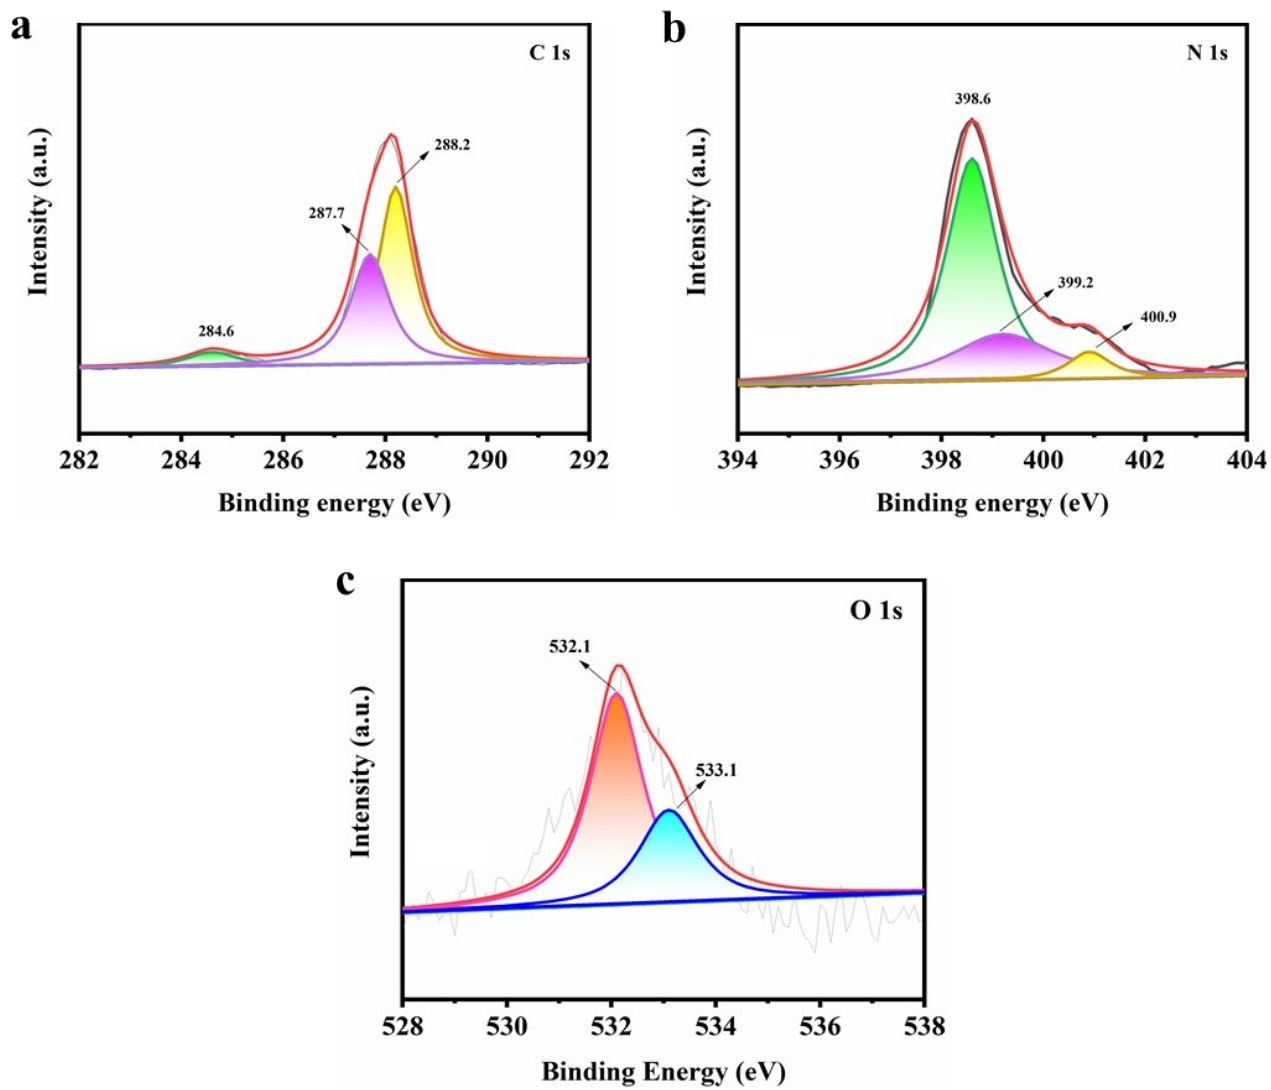

**Figure S6.** (a) High-resolution XPS spectra of C 1s, (b) N 1s and (c) O 1s for CN.

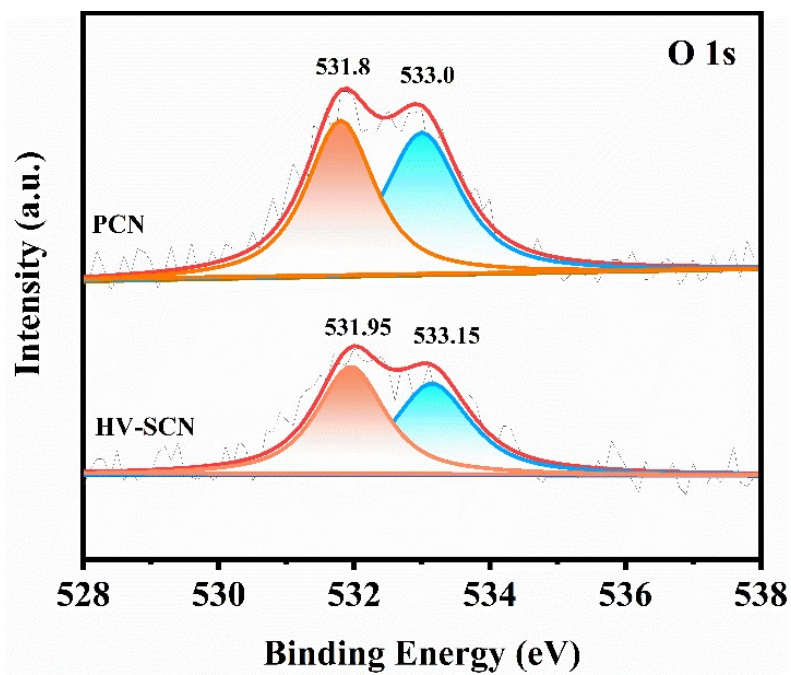

**Figure S7.** High-resolution XPS spectra of O 1s for PCN and HV-SCN.

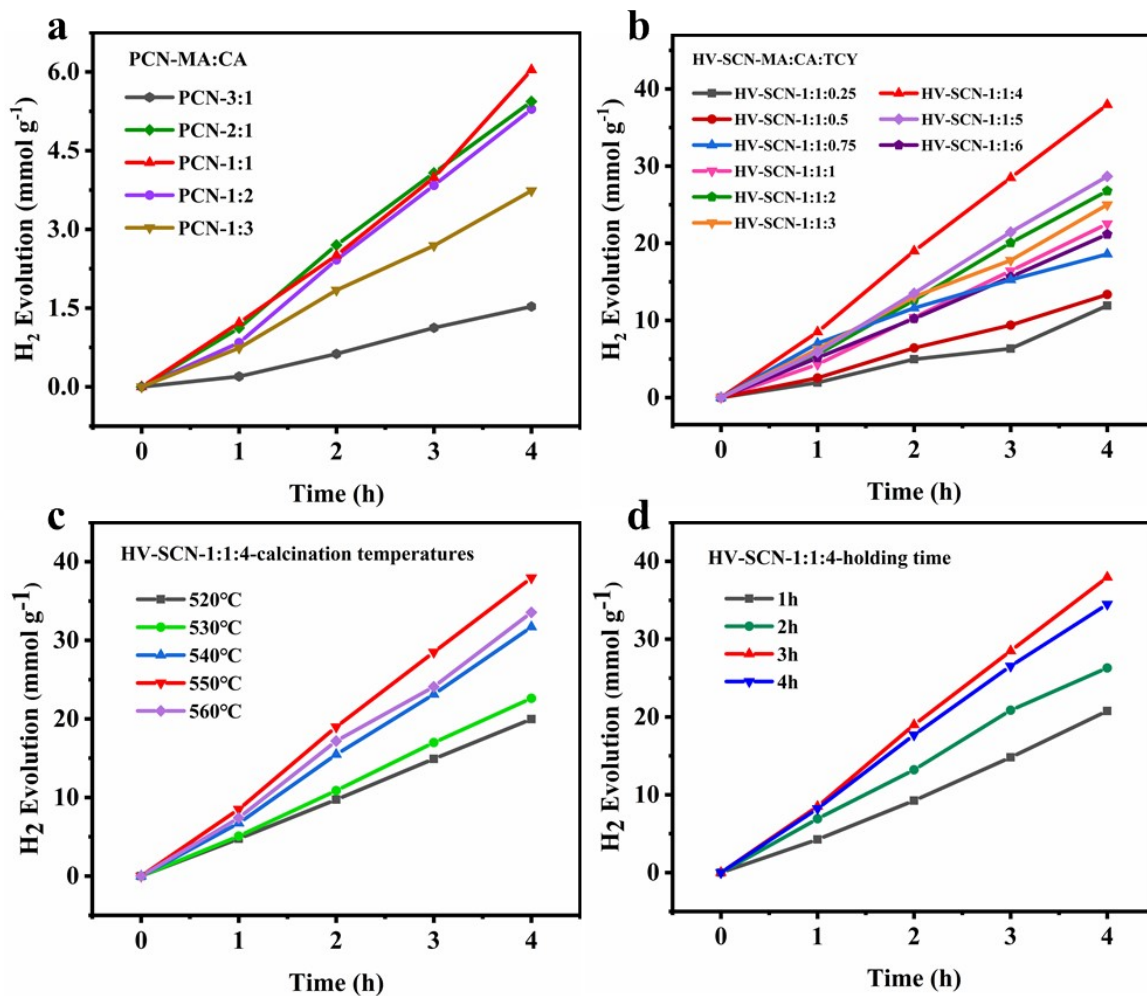

**Figure S8.** (a) Photocatalytic HER performance of PCN and (b) HV-SCN obtained at different precursor ratios. (c) Photocatalytic HER performance of HV-SCN obtained at different calcination temperatures. (d) Photocatalytic HER performance of HV-SCN obtained at different holding times.

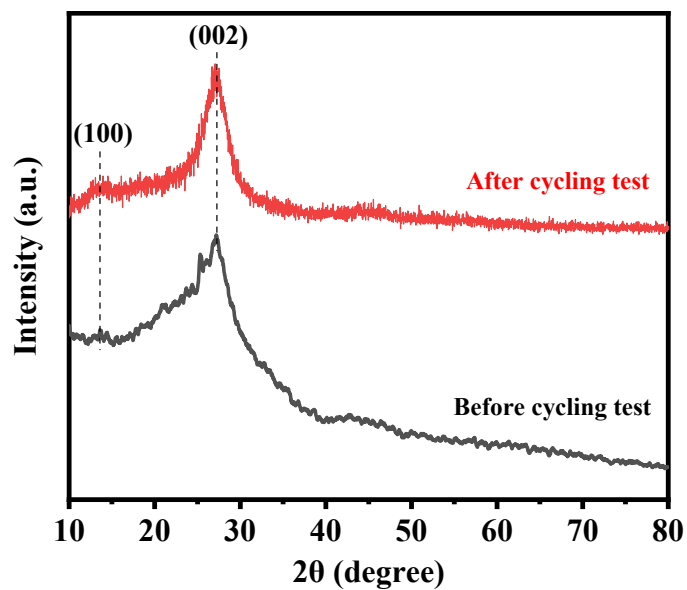

**Figure S9.** XRD patterns of HV-SCN before and after 24h continuous photocatalytic HER testing.

The (100) and (002) peaks of HV-SCN do not shift after stability testing. Moreover, the peak shape does not change significantly. The result proves the good structural integrity of developed HV-SCN catalyst.

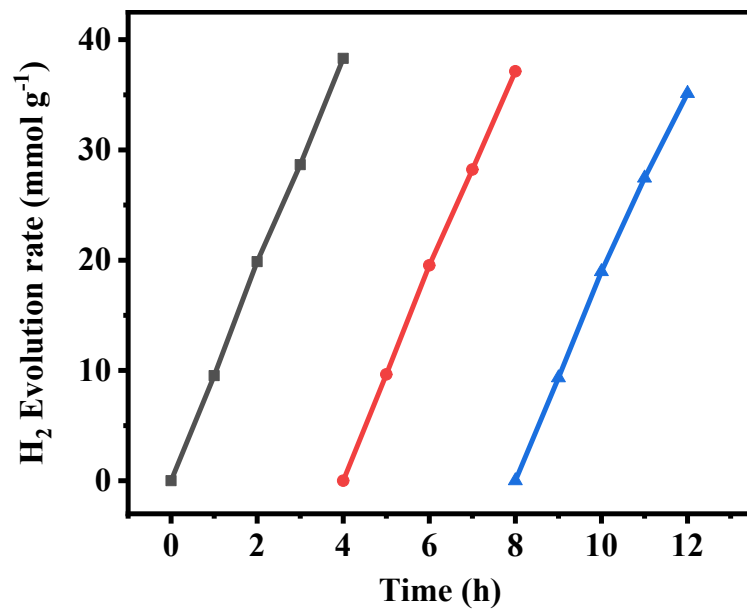

**Figure S10.** The photocatalytic stability of the HV-SCN after resting in a dry environment for 40 days.

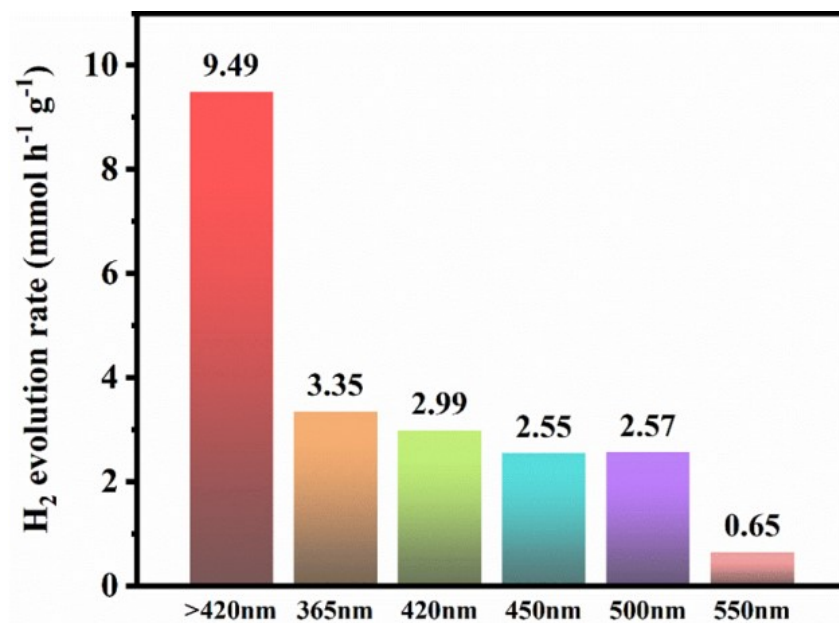

**Figure S11.** Photocatalytic H<sub>2</sub> evolution rate of HV-SCN at different wavelengths.



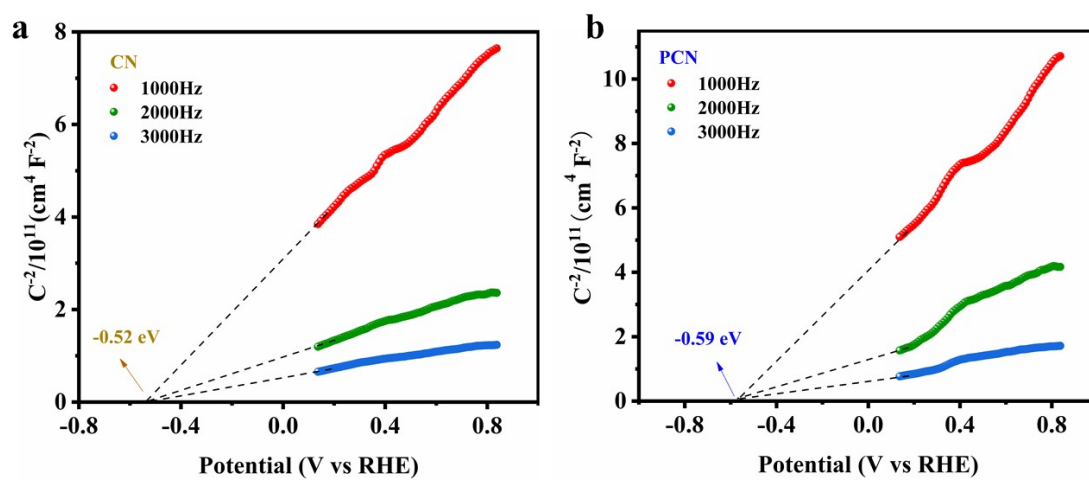

**Figure S12.** M-S plots of CN and PCN obtained at different frequencies.

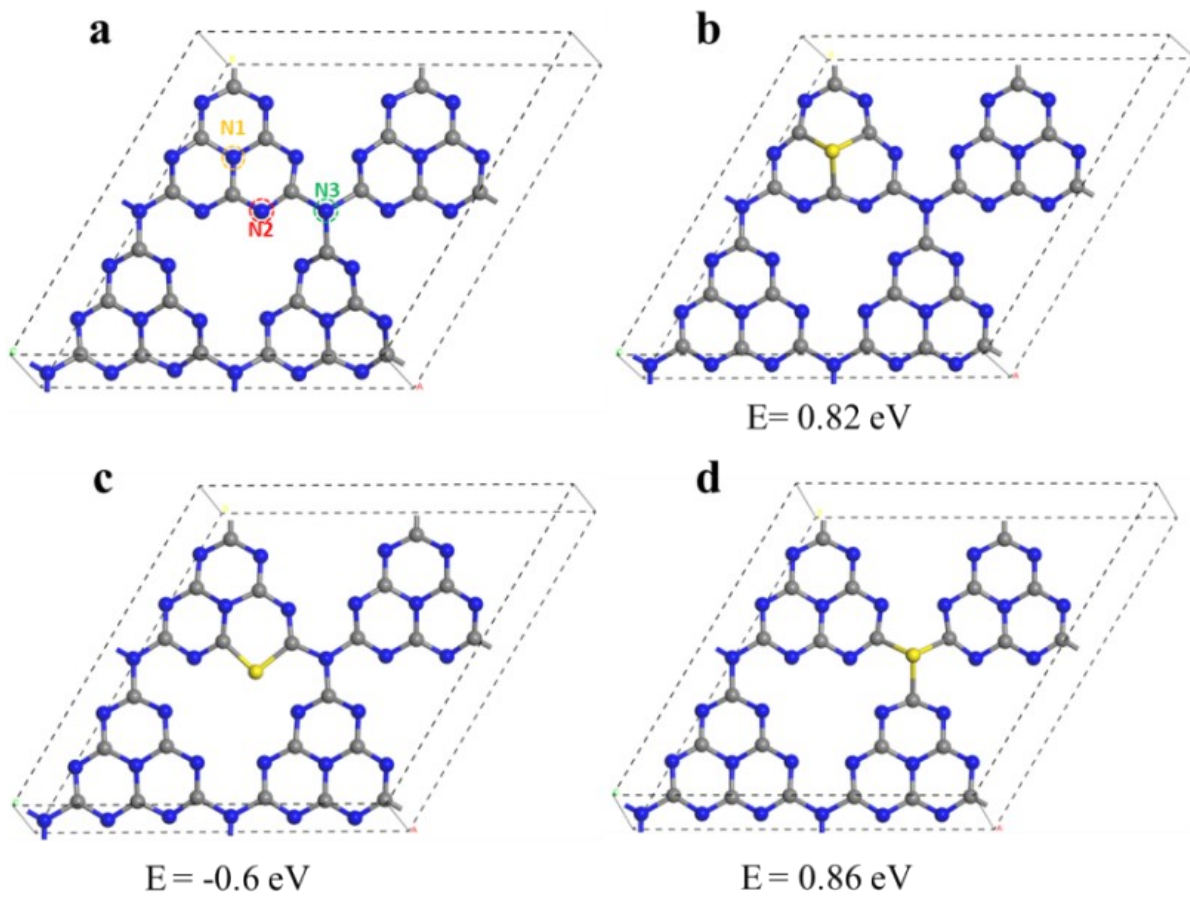

**Figure S13.** (a) Structure diagram of S-doping of different N-Sites for CN, and (b-d) the corresponding formation energy of different S-doping for CN.

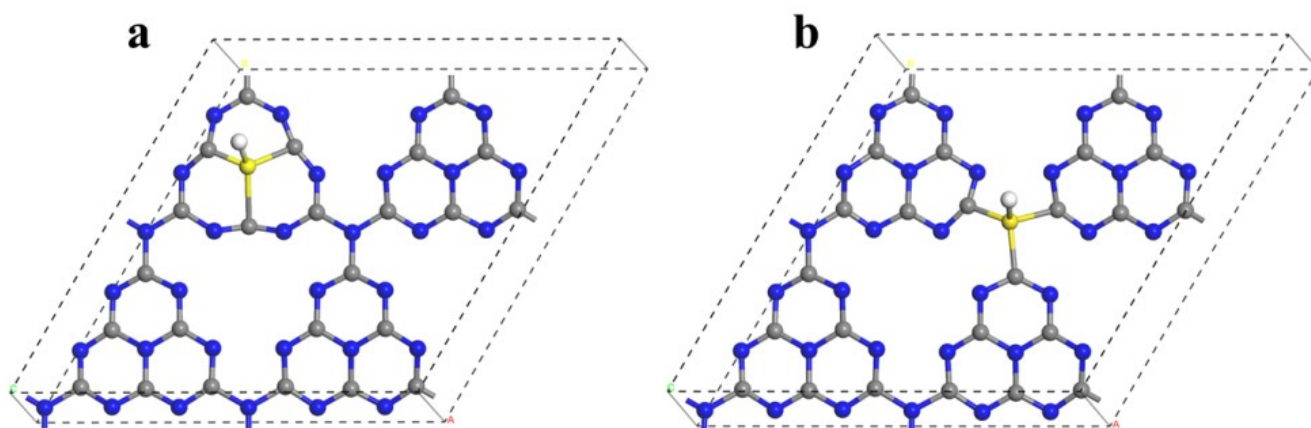

**Figure S14.** Optimized adsorption structures of H\* intermediate at different S active sites of HV-SCN.

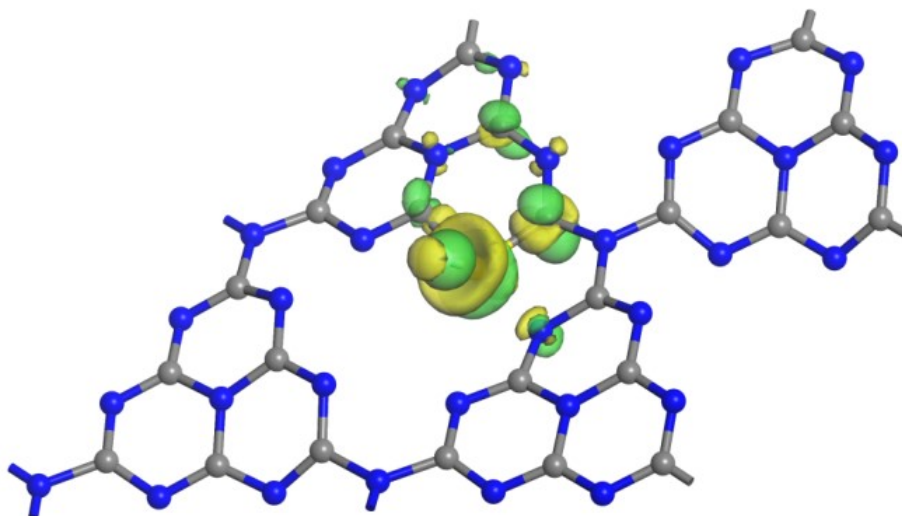

**Figure S15.** Top view of charge density difference for HV-SCN.

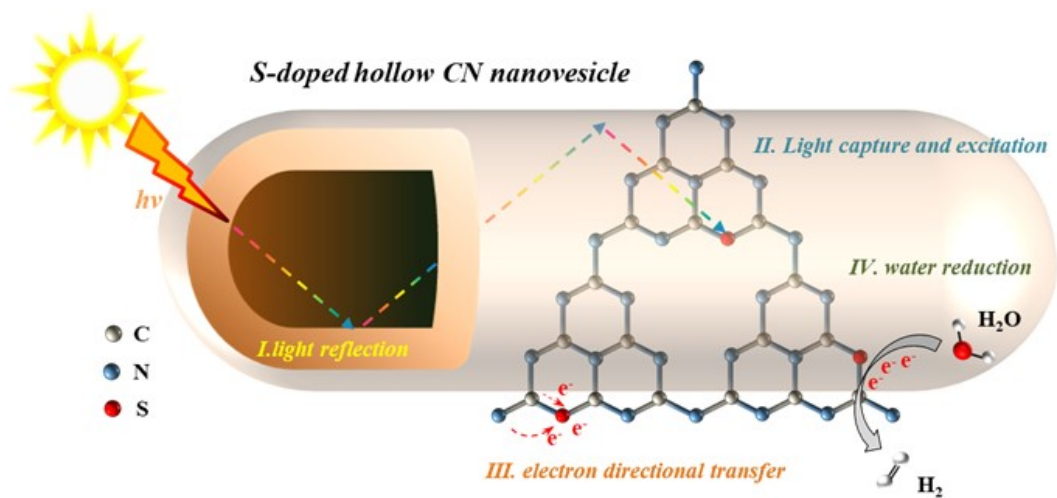

**Figure S16.** Schematic of the photocatalytic  $H_2$  evolution mechanism of HV-SCN.

**Table S1.** Specific surface area and total pore volume of CN, PCN and HV-SCN.

| <b>Samples</b> | <b>S<sub>BET</sub> (m<sup>2</sup> g<sup>-1</sup>)</b> | <b>V<sub>Pore</sub> (cm<sup>3</sup> g<sup>-1</sup>)</b> |
|----------------|-------------------------------------------------------|---------------------------------------------------------|
| CN             | 5.08                                                  | 0.029                                                   |
| PCN            | 49.94                                                 | 0.334                                                   |
| HV-SCN         | 70.93                                                 | 0.405                                                   |

**Table S2.** The EA results of CN, PCN and HV-SCN.

| <b>Samples</b> | <b>C (at.%)</b> | <b>N (at.%)</b> | <b>S (at.%)</b> | <b>C/N</b> |
|----------------|-----------------|-----------------|-----------------|------------|
| CN             | 33.99           | 59.72           | \               | 0.569      |
| PCN            | 33.62           | 58.62           | \               | 0.574      |
| HV-SCN         | 32.81           | 56.49           | 0.15            | 0.581      |

**Table S3.** The XPS results of CN, PCN and HV-SCN.

| <b>Samples</b> | <b>C (at.%)</b> | <b>N (at.%)</b> | <b>O (at.%)</b> | <b>S (at.%)</b> |
|----------------|-----------------|-----------------|-----------------|-----------------|
| CN             | 40.94           | 56.59           | 2.47            | \               |
| PCN            | 41.91           | 54.83           | 3.26            | \               |
| HV-SCN         | 42.47           | 54.52           | 2.78            | 0.23            |

**Table S4.** The S 2p XPS results of HV-SCN.

| <b>Samples</b> | <b>Peak</b> | <b>Binding energy (eV)</b> | <b>Assignment</b> | <b>FWHM (eV)</b> | <b>Area (Arb. unit)</b> | <b>ratio</b> |
|----------------|-------------|----------------------------|-------------------|------------------|-------------------------|--------------|
| HV-SCN         | S 2p        | 164.3                      | S-C               | 2                | 446.97                  | 0.809        |
|                |             | 168.3                      | S-O               | 2.1              | 105.705                 | 0.191        |



**Table S5.** The C 1s XPS results of CN, PCN and HV-SCN.

| <b>Samples</b> | <b>Peak</b> | <b>Binding energy (eV)</b> | <b>Assignment</b> | <b>FWHM (eV)</b> | <b>Area (Arb. unit)</b> | <b>ratio</b> |
|----------------|-------------|----------------------------|-------------------|------------------|-------------------------|--------------|
| CN             |             | 284.6                      | C-C               | 1.15             | 6561                    | 0.063        |
|                |             | 287.7                      | C-NH <sub>2</sub> | 0.9              | 39744.98                | 0.385        |
|                |             | 288.2                      | N-C=N             | 0.8              | 56967.81                | 0.552        |
| PCN            | C 1s        | 284.6                      | C-C               | 1.15             | 10000                   | 0.101        |
|                |             | 287.8                      | C-NH <sub>2</sub> | 0.9              | 40582.35                | 0.407        |
|                |             | 288.3                      | N-C=N             | 0.8              | 49057.91                | 0.492        |
| HV-SCN         |             | 284.6                      | C-C               | 1.15             | 10000                   | 0.099        |
|                |             | 287.8                      | C-NH <sub>2</sub> | 0.9              | 44886.95                | 0.446        |
|                |             | 288.3                      | N-C=N             | 0.8              | 45882.82                | 0.455        |

**Table S6.** The N 1s XPS results of CN, PCN and HV-SCN.

| Samples | Peak | Binding energy (eV) | Assignment         | FWHM (eV) | Area (Arb. unit) | ratio |
|---------|------|---------------------|--------------------|-----------|------------------|-------|
| CN      |      | 398.6               | C-N=C              | 1.2       | 162740.6         | 0.659 |
|         |      | 399.2               | N-(C) <sub>3</sub> | 2.9       | 67716            | 0.274 |
|         |      | 400.9               | C-NH <sub>2</sub>  | 1         | 16430.29         | 0.067 |
| PCN     | N 1s | 398.6               | C-N=C              | 1.2       | 86214.89         | 0.604 |
|         |      | 399.2               | N-(C) <sub>3</sub> | 2.9       | 49097.09         | 0.344 |
|         |      | 400.9               | C-NH <sub>2</sub>  | 1         | 7511.512         | 0.052 |
| HV-SCN  |      | 398.6               | C-N=C              | 1.2       | 79994.01         | 0.536 |
|         |      | 399.2               | N-(C) <sub>3</sub> | 2.9       | 62189.59         | 0.417 |
|         |      | 400.9               | C-NH <sub>2</sub>  | 1         | 7087.209         | 0.047 |

**Table S7.** The O 1s XPS results of CN, PCN and HV-SCN.

| <b>Samples</b> | <b>Peak</b> | <b>Binding energy (eV)</b> | <b>Assignment</b> | <b>FWHM (eV)</b> | <b>Area (Arb. unit)</b> | <b>ratio</b> |
|----------------|-------------|----------------------------|-------------------|------------------|-------------------------|--------------|
| CN             |             | 532.1                      | adsorb oxygen     | 1.2              | 5347.007                | 0.670        |
|                |             | 533.1                      | adsorbed water    | 1.35             | 2638.99                 | 0.330        |
| PCN            | O 1s        | 531.8                      | adsorb oxygen     | 1.2              | 5566.888                | 0.493        |
|                |             | 533                        | adsorbed water    | 1.35             | 5722.988                | 0.507        |
| HV-SCN         |             | 531.95                     | adsorb oxygen     | 1.2              | 3864.309                | 0.512        |
|                |             | 533.15                     | adsorbed water    | 1.35             | 3669.809                | 0.478        |

**Table S8.** Comparison of photocatalytic HER activities of other S-doped CN catalysts reported recently.

| Catalysts                              | Loading (mg) | Sacrificial agents  | Light Source                      | Co-catalysts    | H <sub>2</sub> evolution rate (mmol g <sup>-1</sup> h <sup>-1</sup> ) | Ref.             |
|----------------------------------------|--------------|---------------------|-----------------------------------|-----------------|-----------------------------------------------------------------------|------------------|
| SPCN0.1                                | 50           | 10 vol% TEOA        | 300 W Xe lamp (420 nm cut)        | 3 wt% Pt        | 4.20                                                                  | [1]              |
| HS-SPHI-650                            | 50           | 10 vol% TEOA        | 300 W Xe lamp (420 nm cut)        | 2 wt% Pt        | 3.58                                                                  | [2]              |
| SCN/NiS-1                              | 20           | 10 vol% TEOA        | 300 W Xe lamp (400 nm cut)        | \               | 0.70                                                                  | [3]              |
| 0.36-SUCN                              | 20           | 10 vol% TEOA        | 300 W Xe lamp                     | 2 wt% Pt        | 8.07                                                                  | [4]              |
| S-g-C <sub>3</sub> N <sub>4</sub> -E   | 20           | 10 vol% TEOA        | 300 W Xe lamp (420 nm cut)        | 3 wt% Pt        | 5.55                                                                  | [5]              |
| S-g-C <sub>3</sub> N <sub>4</sub> -D-1 | 20           | 10 vol% TEOA        | 300 W Xe lamp (420 nm cut)        | 3 wt% Pt        | 5.65                                                                  | [6]              |
| 6Sr-SCN                                | 10           | 17 vol% TEOA        | 500 W Xe lamp (420 nm cut)        | 3 wt% Pt        | 1.39                                                                  | [7]              |
| SCN-tm/CN                              | 50           | 10 vol% TEOA        | 300 W Xe lamp (420 nm cut)        | 3 wt% Pt        | 5.41                                                                  | [8]              |
| SCN <sub>0.8</sub>                     | 20           | 10 vol% lactic acid | 300 W Xe lamp (AM1.5G)            | 2 wt% Pt        | 3.93                                                                  | [9]              |
| S-g-C <sub>3</sub> N <sub>4</sub> -D-2 | 20           | 10 vol% TEOA        | 300 W Xe lamp (420 nm cut)        | 3 wt% Pt        | 3.11                                                                  | [10]             |
| g-CN-TM1                               | 10           | 10 vol% TEOA        | 300 W Xe lamp (420 nm cut)        | 0.5 wt% Pt      | 4.43                                                                  | [11]             |
| S-CN(0.1)                              | 50           | 10 vol% TEOA        | 300 W Xe lamp (420 nm cut)        | 3 wt% Pt        | 6.23                                                                  | [12]             |
| S-CN/Pt <sub>0.3</sub>                 | 100          | 20 vol% methanol    | 300 W Xe lamp                     | \               | 0.74                                                                  | [13]             |
| SS-CN                                  | 50           | 20 vol% TEOA        | 300 W Xe lamp (420 nm cut)        | 1 wt% Pt        | 0.98                                                                  | [14]             |
| <b>HV-SCN</b>                          | <b>20</b>    | <b>10 vol% TEOA</b> | <b>300 W Xe lamp (420 nm cut)</b> | <b>3 wt% Pt</b> | <b>9.49</b>                                                           | <b>This work</b> |

**Table S9.** Dynamics analysis of emission decay for different photocatalysts.

| <b>Sample</b> | <b><math>\tau_1</math> (ns)</b> | <b><math>A_1</math></b> | <b><math>\tau_2</math> (ns)</b> | <b><math>A_2</math></b> | <b><math>\tau_{ave}</math> (ns)</b> |
|---------------|---------------------------------|-------------------------|---------------------------------|-------------------------|-------------------------------------|
| CN            | 1.285                           | 1947840.0               | 9.539                           | 844.7                   | 1.311                               |
| PCN           | 1.523                           | 593575.4                | 9.604                           | 1319.1                  | 1.641                               |
| HV-SCN        | 1.843                           | 230365.4                | 8.981                           | 2003.5                  | 2.175                               |

**Table S10.** fs-TAS results of CN , PCN and HV-SCN.

| <b>Sample</b> | <b><math>\tau_1</math> (ns)</b> | <b><math>A_1</math></b> | <b><math>\tau_2</math>(ns)</b> | <b><math>A_2</math></b> | <b><math>R^2</math></b> |
|---------------|---------------------------------|-------------------------|--------------------------------|-------------------------|-------------------------|
| CN            | 10.17                           | 1.344                   | 163.78                         | 0.422                   | 0.99051                 |
| PCN           | 4.24                            | 0.285                   | 118.88                         | 4.202                   | 0.99966                 |
| HV-SCN        | 3.42                            | 0.397                   | 120.58                         | 4.151                   | 0.9994                  |

## Supplementary Reference

- [1] Y. Jiao, M. Liu, J. Qin, et al., Sulfur/phosphorus doping-mediated morphology transformation of carbon nitride from rods to porous microtubes with superior photocatalytic activity. *J. Colloid Interface Sci.* **2022**, 608, 1432-1440.
- [2] Y. Gao, Y. Li, L. Shangguan, et al., Optimizing the band structure of sponge-like S-doped poly(heptazine imide) with quantum confinement effect towards boosting visible-light photocatalytic H<sub>2</sub> generation. *J. Colloid Interface Sci.* **2023**, 644, 116-123.
- [3] G. Zhou, Z. Zhou, Y. Xia, et al., Synchronous synthesis of S-doped carbon nitride/nickel sulfide photocatalysts for efficient dye degradation and hydrogen evolution. *Appl. Surf. Sci.* **2023**, 608, 154974.
- [4] X. Wu, D. Li, B. Luo, et al., Molecular-level insights on NIR-driven photocatalytic H<sub>2</sub> generation with ultrathin porous S-doped g-C<sub>3</sub>N<sub>4</sub> nanosheets. *Appl. Catal., B* **2023**, 325, 122292.
- [5] J. Jiang, Z. Xiong, H. Wang, et al., Sulfur-doped g-C<sub>3</sub>N<sub>4</sub>/g-C<sub>3</sub>N<sub>4</sub> isotype step-scheme heterojunction for photocatalytic H<sub>2</sub> evolution. *J. Mater. Sci. Technol* **2022**, 118, 15-24.
- [6] H. Wang, J. Jiang, L. Yu, et al., Tailoring advanced N-defective and S-doped g-C<sub>3</sub>N<sub>4</sub> for photocatalytic H<sub>2</sub> evolution. *Small* **2023**, 19, e2301116.
- [7] F. Liu, W. Li, L. Wang, et al., Sulfur- and strontium-doped graphitic carbon nitride for efficient photocatalytic hydrogen evolution. *ACS Appl. Energy Mater* **2022**, 5, 15834-15843.
- [8] Y. Gu, Y. Li, H. Feng, Y. Han, Z. Li, Built-in electric field induced S-scheme g-C<sub>3</sub>N<sub>4</sub> homojunction for efficient photocatalytic hydrogen evolution: Interfacial engineering and

morphology control. *Nano Res* **2024**, 17, 4961-4970.

[9] S. Lin, B. Wu, Q. Li, et al., Rod-shaped aggregates of sulfur-doped carbon nitride nanosheets for enhanced photocatalytic hydrogen evolution. *Science China Materials* **2023**, 66, 4669-4679.

[10] J. Zou, G. Liao, J. Jiang, et al., In-situ construction of sulfur-doped g-C<sub>3</sub>N<sub>4</sub>/defective g-C<sub>3</sub>N<sub>4</sub> Iso-type step-scheme heterojunction for boosting photocatalytic H<sub>2</sub> evolution. *Chin. J. Struct. Chem* **2022**, 41, 2201025-2201033.

[11] L. Niu, J. Du, X. Tian, et al., Facile steam activation route to synthesize S-doped graphitic polymeric carbon nitride nanosheets for increased photocatalytic H<sub>2</sub> generation. *Mater. Lett.* **2021**, 300, 130120.

[12] L. Luo, J. Ma, K. Wang, et al., Ultrathin sulfur-doped holey carbon nitride nanosheets with superior photocatalytic hydrogen production from water. *Appl. Catal., B* **2021**, 284, 119742.

[13] Z. Li, Y. Yao, X. Gao, H. Bai, X. Meng, Interfacial charge transfer and enhanced photocatalytic mechanisms for Pt nanoparticles loaded onto sulfur-doped g-C<sub>3</sub>N<sub>4</sub> in H<sub>2</sub> evolution. *Mater. Today Energy* **2021**, 22, 100881.

[14] C. Feng, L. Tang, Y. Deng, et al., A novel sulfur-assisted annealing method of g-C<sub>3</sub>N<sub>4</sub> nanosheet compensates for the loss of light absorption with further promoted charge transfer for photocatalytic production of H<sub>2</sub> and H<sub>2</sub>O<sub>2</sub>. *Appl. Catal., B* **2021**, 281, 119539.
